# Supplementary material
Source: Springer Nature journal article supplement (https://www.springermedizin.de/resource/supplementary/13075_2004_1370_MOESM3_ESM.pdf/9689624)

**(a)**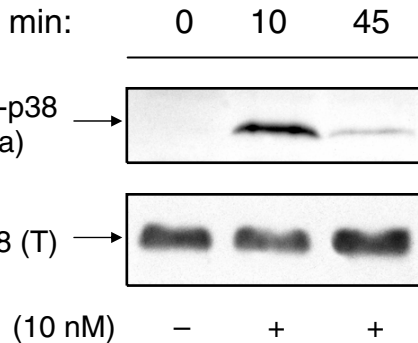**(b)**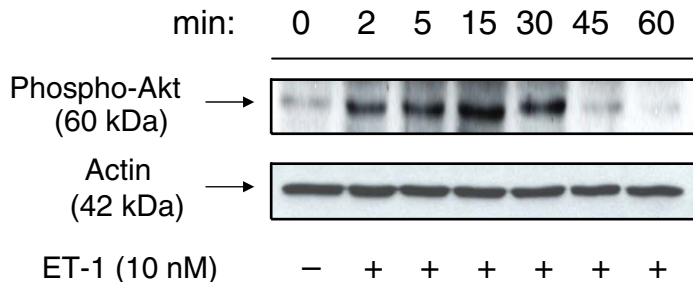**(c)**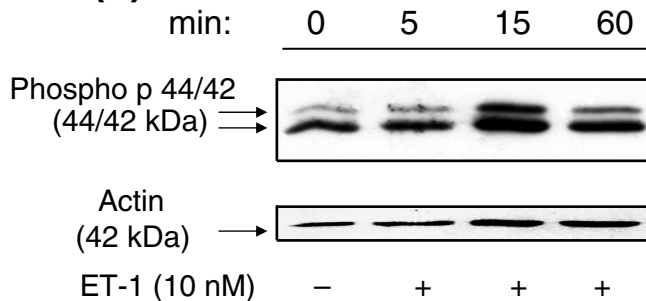**(d)**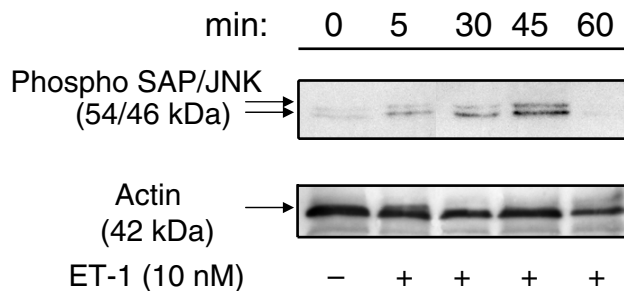

Supplement: MOESM3 [file 9689624]
